# Supplementary material
Source: publisher figshare collection journal article supplement (https://acs.figshare.com/ndownloader/files/9462325)
Supplement: Supplementary file 1 [file 9462325]

# Supporting Information

## Ultrasensitive Quantitation of Plasma Membrane Proteins via *is*RTA

Tao Gao,<sup>†</sup> Bei Wang,<sup>†</sup> Liu Shi,<sup>†</sup> Xiaoli Zhu,<sup>‡</sup> Yang Xiang,<sup>†</sup> Jun-ichi Anzai,<sup>§</sup> and Genxi Li<sup>\*,†,‡</sup>

<sup>†</sup>State Key Laboratory of Pharmaceutical Biotechnology and Collaborative Innovation Center of Chemistry for Life Sciences, Department of Biochemistry, Nanjing University, Nanjing 210093, P. R. China

<sup>‡</sup>Center for Molecular Recognition and Biosensing, School of Life Sciences, Shanghai University, Shanghai 200444, P. R. China

<sup>§</sup>Graduate School of Pharmaceutical Sciences, Tohoku University, Aramaki, Aoba-ku, Sendai 980-8578, Japan

\*E-mail: [genxili@nju.edu.cn](mailto:genxili@nju.edu.cn). Telephone: +86-25-83593596.

## **Supplementary Figures and Tables**

**Figure S1.** HPLC characterization and purification of the synthesized aptamer probes

**Figure S2.** Generation of single-stranded circular template DNA (cDNA)

**Figure S3.** SDS-PAGE analysis of the PMP labeling efficiency

**Figure S4.** PMP labeling on glass slide surface

**Figure S5.** Feasibility of RCA reaction

**Figure S6.** Quantitation of RCA products with the fluorimetric PPi assay

**Figure S7.** Real-time monitoring of the nicking enzyme reaction

**Figure S8.** HPLC characterization of the nicking enzyme reaction

**Figure S9.** Calibration curve of the fluorescent signal of qFB

**Figure S10.** Profiling PMP biomarkers on different cell lines

**Table S1.** Details of DNA oligonucleotide sequences

**Table S2.** PPi assay to test RCA reaction efficiency

**Table S3.** Fluorescent signal calibration to test *is*RTA reaction efficiency

**Table S4.** Buffers used in the enzyme reaction activity tests

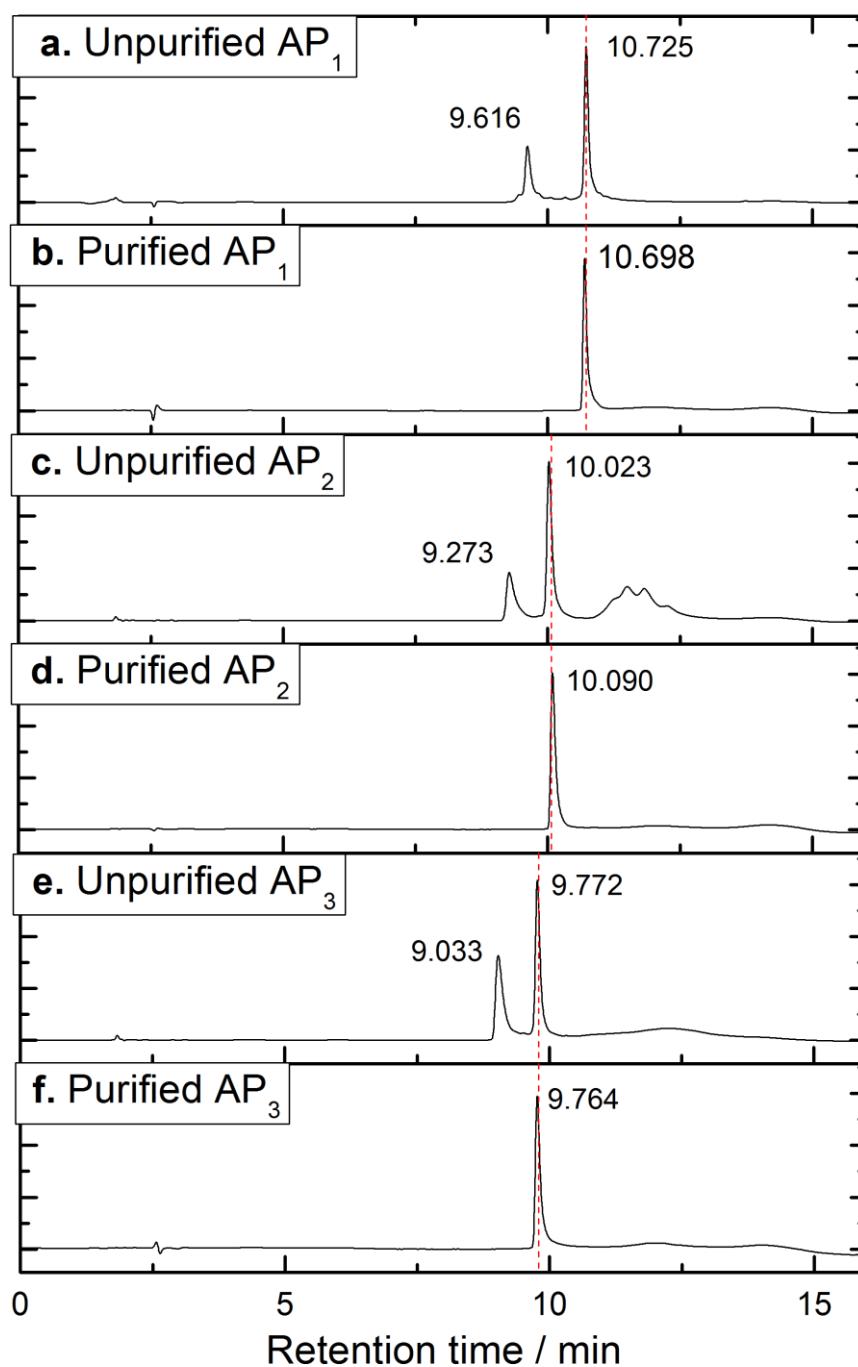

**Figure S1.** HPLC characterization and purification of the aptamer probes (APs). **a**, **c** and **e** showed the reaction mixtures of AP<sub>1</sub>, AP<sub>2</sub> and AP<sub>3</sub>, respectively. **b**, **d** and **f** showed the corresponding APs after purification.

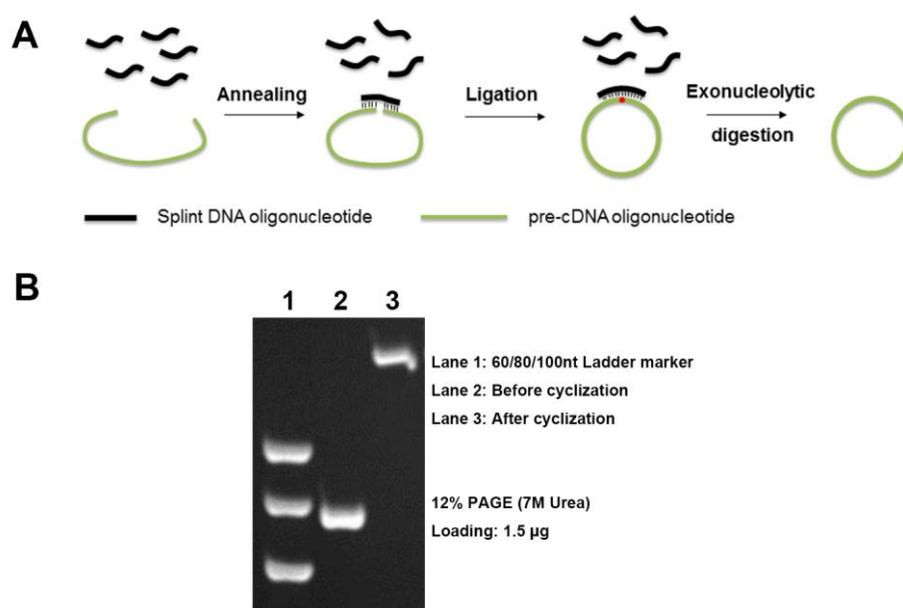

**Figure S2.** Generation of single-stranded circular template DNA (cDNA). **(A)** Schematic illustration shows the procedure for cDNA preparation. **(B)** PAGE assay of cDNA before (lane 2) and after (lane 3) cyclization reaction.

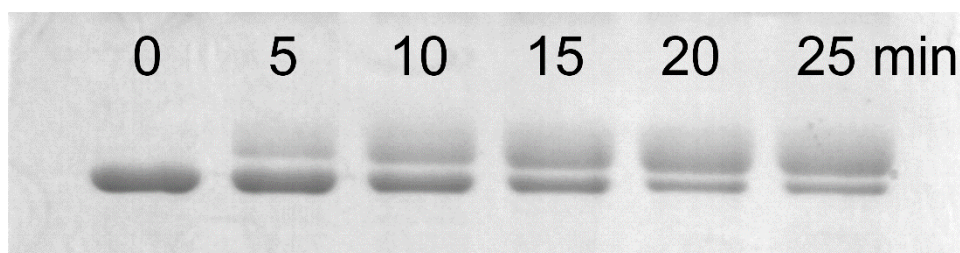

**Figure S3.** SDS-PAGE (12%) analysis of PMP labeling efficiency with **APs**, displaying a time range of UV light (365 nm) irradiation with a loading sample containing 4.2  $\mu\text{M}$  PMP (HER2 protein) and 10  $\mu\text{M}$  **AP**. Increased band intensity of the AP-PMP conjugates (upper band) reveals a positive relationship between efficiency and irradiation time. And the irradiation time of at least 20 min is required to ensure an optimal conversion over 75%.

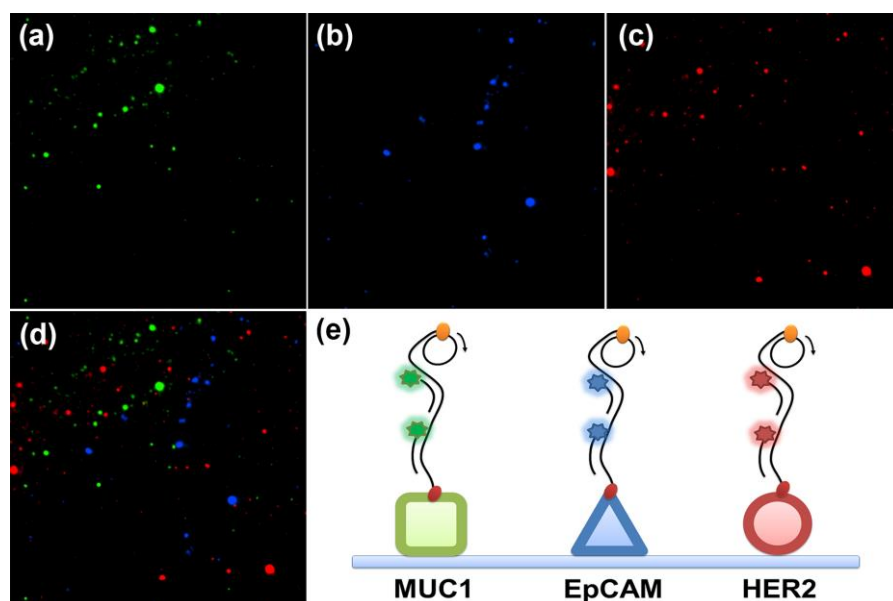

**Figure S4.** PMP labeling on glass slide surface. Fluorescence imaging of RCA amplicons (individual color spots) generated by corresponding AP-PMP conjunctions on the glass slide surface. Color-coded bright spots in these fluorescent images show locations of (a)  $AP_1$ -MUC1 (green), (b)  $AP_2$ -EpCAM (blue), (c)  $AP_3$ -HER2 (red) conjunctions, and (d) merged signals. Fluorescent signals were obtained by hybridization RCA amplicons with the corresponding iFBs that were modified with dyes of FAM (iFB<sub>1</sub>), AMCA (iFB<sub>2</sub>) and Cy3 (iFB<sub>3</sub>).

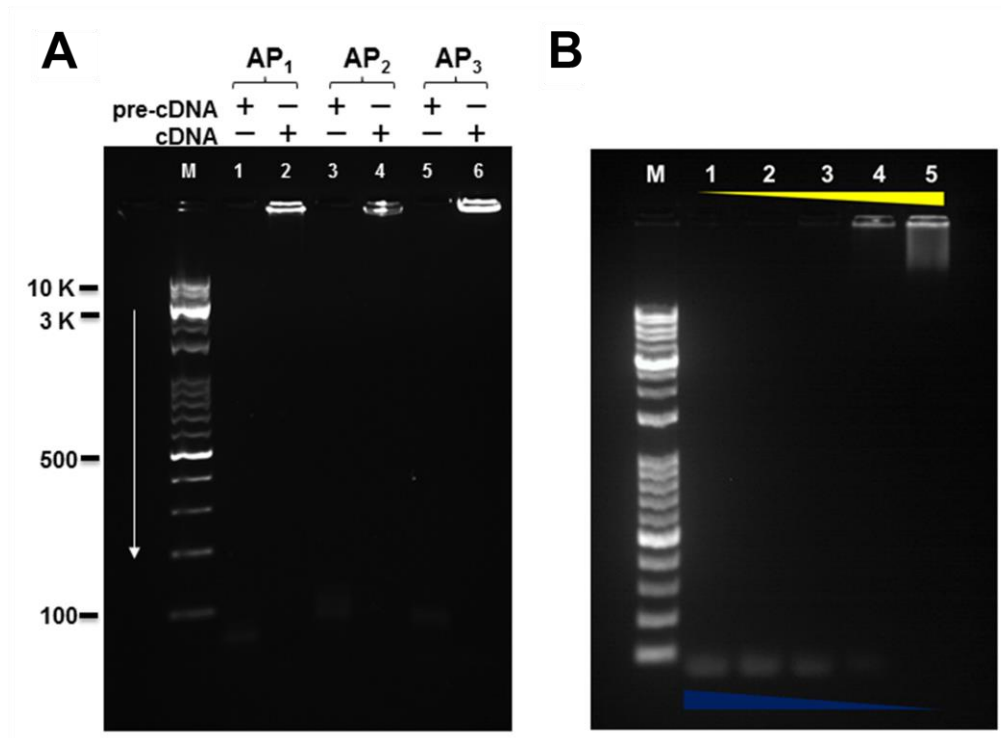

**Figure S5.** Feasibility of RCA reaction. **(A)** Agarose gel (1.5%) analysis of the RCA products by using cDNA and pre-cDNA pares. Lane M, 0.1-10 Kbp DNA ladder marker; Lanes 2, 4 and 6, RCA products by using 100 nM cDNA and corresponding **AP**<sub>1</sub>, **AP**<sub>2</sub> and **AP**<sub>3</sub>; Lanes 1, 3 and 5, 100 nM each pre-cDNA were used for RCA. RCA products were not observed by using pre-cDNA, indicating RCA reaction couldn't be initiated by pre-cDNA. **(B)** Different **AP** concentrations (0, 1, 10, 100 and 1000 pM, lanes 1-5) were used to perform RCA reactions. Results show that the amount of RCA products increases with the increased of **AP** concentration.

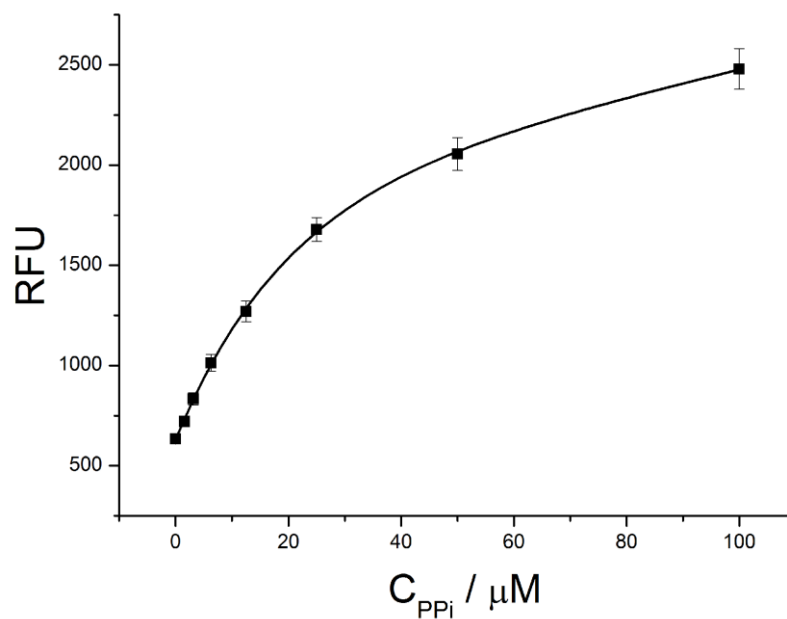

**Figure S6.** RCA products quantified by fluorimetric PPI assay. After RCA reaction, RCA products was removed with a QIAquick Nucleotide Removal Kit. The concentration of PPI in the reaction mixture was determined with a PhosphoWorks fluorimetric pyrophosphate (PPI) assay kit (AAT Bioquest, USA). The curve was stimulated by ExpAssoc model with an Origin 8.5 software,  $r^2 = 0.999$ .



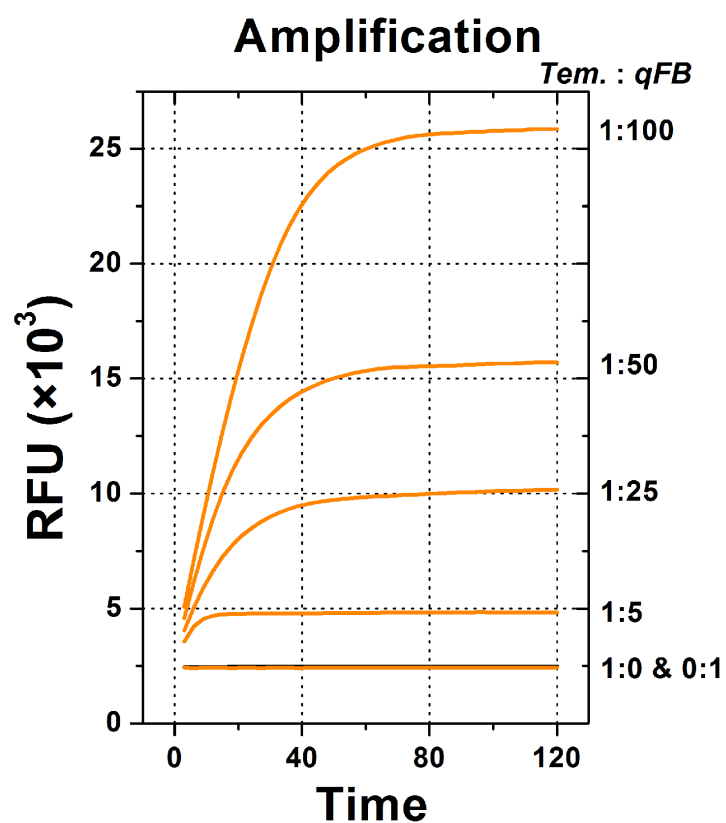

**Figure S7.** Real-time monitoring of the nicking enzyme reaction. The reaction mixture contains 10 nM template repeats (*Tem.*) and 0, 50, 250, 500, 1000 nM *qFB*s as the substrates, respectively. The concentration ratios between *Tem.* and *qFB* are shown in right part of the figure.

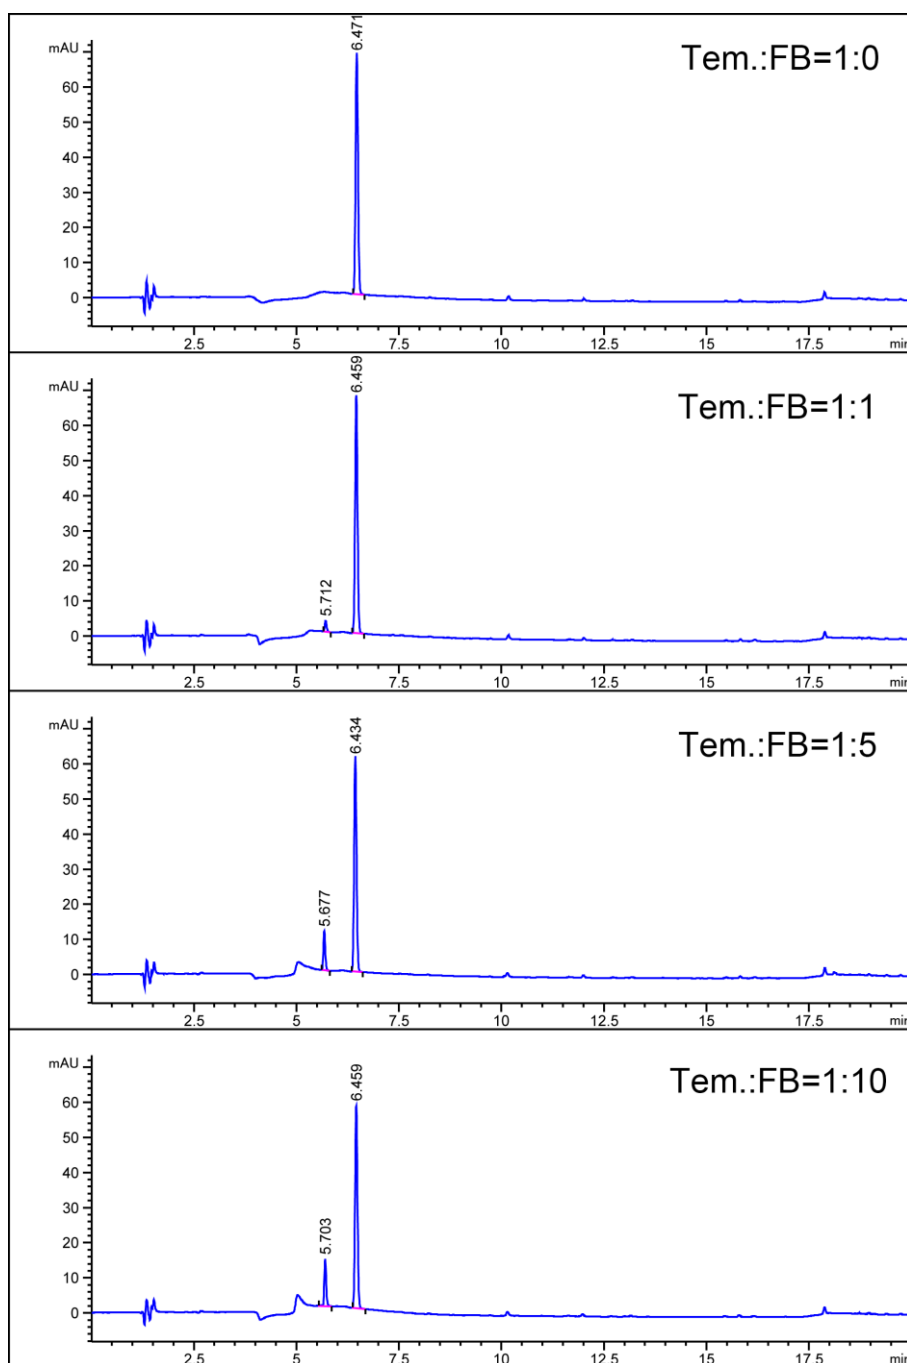

**Figure S8.** HPLC characterization of template-dependent cyclic degradation of fluorescence beacons (qFBs). Left peaks show short oligonucleotides generated from the degradation reaction, with a short retention time. Right peaks show long oligonucleotides Tem. and qFB, with a longer retention time. From top to down, the concentration of products increases with the concentration of the qFB, UV 254 nm.

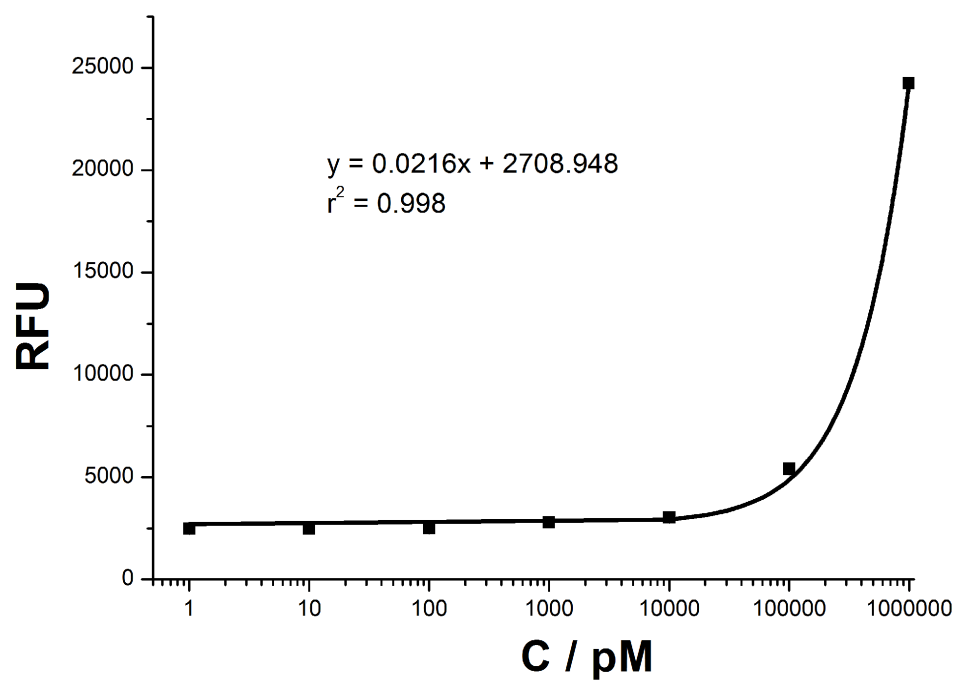

**Figure S9.** Calibration curve of the fluorescent signals were generated by digesting different concentrations of qFBs.

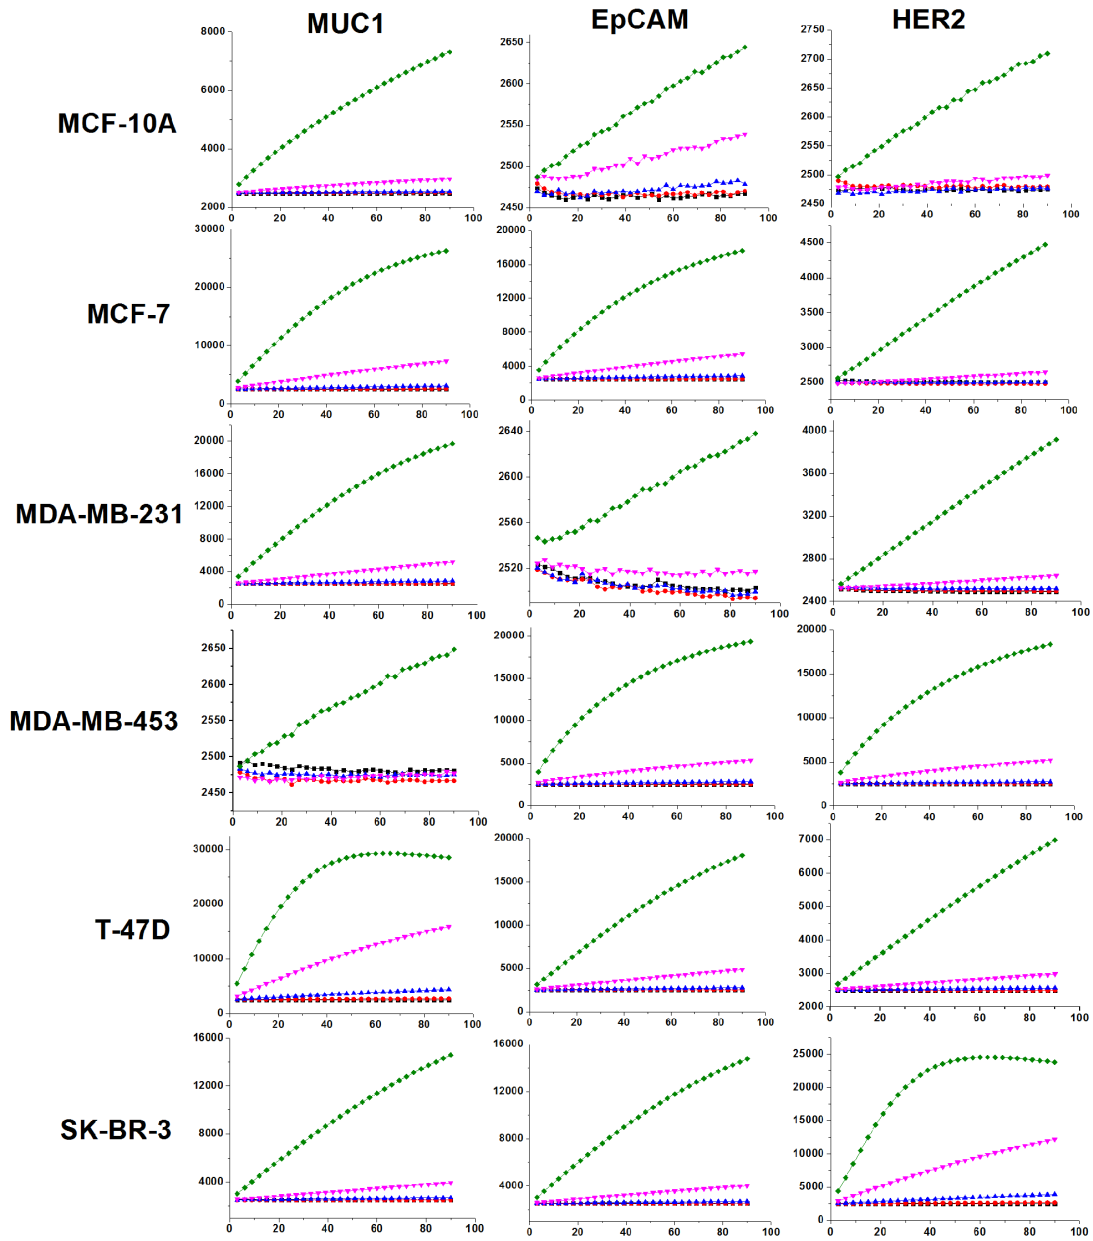

**Figure S10.** Profiling PMPs on different breast cell lines. For each of the cell line, various numbers of cells (0, 1, 10, 100 and 1000, corresponding to curves from bottom to top) were used to perform *is*RTA. The quantitation results for MUC1, EpCAM and HER2 protein biomarkers were shown in Figure 5.

**Table S1.** DNA oligonucleotide sequences used in experiments.

| DNA              | Sequence (5' to 3')                                                                            | Modification       |
|------------------|------------------------------------------------------------------------------------------------|--------------------|
| splint DNA       | GAGAGGGTTGAGGATAGGACATT                                                                        | none               |
| pre-cDNA1        | TCAACCCTCTCGTTTCTTGCTGAGGCTGTTAT<br>CTTGCTGAGGCTGACGCACCTTGCTGAGGCT<br>GCCTGAATGTCCTATCC       | 5'-PO <sub>4</sub> |
| pre-cDNA2        | TCAACCCTCTCGTTTTGTCATATAGTGTCTTTA<br>TTGTCATATAGTGTCTACGCACTGTCATATAGT<br>GTCTCCTGAATGTCCTATCC | 5'-PO <sub>4</sub> |
| pre-cDNA3        | TCAACCCTCTCGTTTACGCAGTATTATGGTTAT<br>ACGCAGTATTATGGACGCACACGCAGTATTAT<br>GGCCTGAATGTCCTATCC    | 5'-PO <sub>4</sub> |
| AP <sub>1</sub>  | GCAGTTGATCCTTTGGATACCCTGGTTTTTTT<br>CAGCCTCAGCAAG                                              | 5'-NH <sub>2</sub> |
| AP <sub>2</sub>  | CACTACAGAGGTTGCGTCTGTCCACGTTGT<br>CATGGGGGGTTGGCCTGTTTTTTTTTTAGACA<br>CTATATGACA               | 5'-NH <sub>2</sub> |
| AP <sub>3</sub>  | GCAGCGGTGTGGGGGCAGCGGTGTGGGGGC<br>AGCGGTGTGGGGTTTTTTTCCATAATACTGCG<br>T                        | 5'-NH <sub>2</sub> |
| iFB <sub>1</sub> | CTTGCTGAGGCTG                                                                                  | 5'-FAM             |
| iFB <sub>2</sub> | TGTCATATAGTGTCT                                                                                | 5'-AMCA            |
| iFB <sub>3</sub> | ACGCAGTATTATGG                                                                                 | 5'-Cy3             |
| qAP <sub>1</sub> | GCAGTTGATCCTTTGGATACCCTGGTTTTTTT<br>CAGCCTCAGCAAG                                              | 5'-NH <sub>2</sub> |
| qAP <sub>2</sub> | CACTACAGAGGTTGCGTCTGTCCACGTTGT<br>CATGGGGGGTTGGCCTGTTTTTTTTTTCAGCC<br>TCAGCAAG                 | 5'-NH <sub>2</sub> |
| qAP <sub>3</sub> | GCAGCGGTGTGGGGGCAGCGGTGTGGGGGC<br>AGCGGTGTGGGGTTTTTTTCAGCCTCAGCAA<br>G                         | 5'-NH <sub>2</sub> |
| qFB              | TAGCTTGCTGAGGCTG                                                                               | 5'-ROX;<br>3'-BHQ2 |

**Table S2.** PPi assay to test RCA reaction efficiency.

| $C_{AP}/pM$ | Fluorescence/<br>RFU | $C_{PPi}/mM$ | DNA length<br><i>per</i><br>amplicon/nt | Tem. repeats<br><i>per</i><br>amplicon/copies | Amplification<br>magnitudes |
|-------------|----------------------|--------------|-----------------------------------------|-----------------------------------------------|-----------------------------|
| 10          | 667±36               | 0.56         | 55900                                   | 2096                                          | 3.32                        |
| 100         | 977±47               | 5.76         | 57600                                   | 2160                                          | 3.33                        |
| 1000        | 1485±80              | 18.29        | 18290                                   | 686                                           | 2.84                        |

**Table S3.** Fluorescent signal calibration to test isRTA reaction efficiency.

| $C_{AP}/aM$ | Fluorescence/RFU | $C_{qFB}/pM$ | Amplification magnitudes |
|-------------|------------------|--------------|--------------------------|
| $10^2$      | 2480±4           | 8.16         | 4.91                     |
| $10^3$      | 2498±7           | 16.80        | 4.83                     |
| $10^4$      | 2529±8           | 690.13       | 4.84                     |
| $10^5$      | 2841±12          | 5984.31      | 4.78                     |
| $10^6$      | 7172±26          | 194019.03    | 4.69                     |
| $10^7$      | 24324±52         | 963037.88    | 4.98                     |
| $10^8$      | 24848±114        | 986506.36    | 3.99                     |

**Table S4.** Buffers used in the enzyme reaction activity tests.

| Buffers            | Components                                                                                                                            | RTA reaction<br>activity (%) |
|--------------------|---------------------------------------------------------------------------------------------------------------------------------------|------------------------------|
| H <sub>2</sub> O   | —                                                                                                                                     | 0                            |
| PRB                | 50 mM Tris-HCl, 10 mM MgCl <sub>2</sub> , 10 mM (NH <sub>4</sub> ) <sub>2</sub> SO <sub>4</sub> , 4 mM DTT, pH 7.5 @ 25°C             | 100                          |
| NRB                | 20 mM Tris-HAc, 50 mM KHAc, 10 mM Mg(HAc) <sub>2</sub> , pH 7.9 @ 25°C                                                                | 59                           |
| PBS                | 135 mM NaCl, 4.7 mM KCl, 10 mM Na <sub>2</sub> HPO <sub>4</sub> , 2 mM NaH <sub>2</sub> PO <sub>4</sub> , pH 7.4 @ 25°C               | 0                            |
| Reaction<br>buffer | 50 mM Tris-HCl, 85 mM NaCl, 10 mM MgCl <sub>2</sub> , 10 mM (NH <sub>4</sub> ) <sub>2</sub> SO <sub>4</sub> , 4 mM DTT, pH 7.5 @ 25°C | 96                           |

## References:

- [1] Ferreira, C. S. M.; Matthews, C. S.; Missailidis, S. *Tumor Biol.* **2006**, *27*, 289-301.
- [2] Song, Y. L.; Zhu, Z.; An, Y.; Zhang, W. T.; Zhang, H. M.; Liu, D.; Yu, C. D.; Duan, W.; Yang, C. J. *Anal. Chem.* **2013**, *85*, 4141-4149.
- [3] Mahlkecht, G.; Maron, R.; Mancini, M.; Schechter, B.; Sela, M.; Yarden, Y. *Proc. Natl. Acad. Sci. U. S. A.* **2013**, *110*, 8170-8175.
- [4] Rees, P.; Wills, J. W.; Brown, M. R.; Tonkin, J.; Holton, M. D.; Hondow, N.; Brown, A. P.; Brydson, R.; Millar, V.; Carpenter, A. E.; Summers, H. D. *Nat. Methods* **2014**, *11*, 1177-1181.
